# Supplementary material for: Schiff-base macrocyclic ZnII complexes based upon flexible pendant-armed extended dialdehydes
Source: Royal Society of Chemistry journal article supplement (doi:10.1039/c8dt03894e), 2018-11-08
Supplement: c8dt03894e1.pdf [file c8dt03894e1.pdf]

## **Schiff-base macrocyclic Zn<sup>II</sup> complexes based upon flexible pendant-armed extended dialdehydes**

Fei-Fan Chang,<sup>a</sup> Kun Zhang,<sup>a,b</sup> Wei Huang\*<sup>a</sup>

<sup>a</sup>State Key Laboratory of Coordination Chemistry, Nanjing National Laboratory of Microstructures, School of Chemistry and Chemical Engineering, Nanjing University, Nanjing 210093, P. R. China

<sup>b</sup>Department of Chemistry, Zhejiang Sci-Tech University, Xiasha Higher Education District, Hangzhou 310018, P. R. China

**Supporting Information**

Table S1 The formulas of complexes 1–30.

|     |                                                                              |                                                                                                                                     |
|-----|------------------------------------------------------------------------------|-------------------------------------------------------------------------------------------------------------------------------------|
| 1   | $[\text{Zn}_2(\text{Hhpdd})_2(\text{H}_2\text{O})_2](\text{NO}_3)_2$         | $[\text{Zn}_2(\text{C}_{24}\text{H}_{20}\text{Cl}_2\text{NO}_5)_2(\text{H}_2\text{O})_2](\text{NO}_3)_2$                            |
| 2   | $[\text{Zn}_2(\text{pdd})_2(\text{H}_2\text{O})_2]$                          | $[\text{Zn}_2(\text{C}_{24}\text{H}_{19}\text{Cl}_2\text{NO}_4)_2(\text{H}_2\text{O})_2]$                                           |
| 3   | $[\text{Zn}_2(\text{H}_2\text{L}_a)](\text{NO}_3)_2$                         | $[\text{Zn}_2(\text{C}_{60}\text{H}_{64}\text{Cl}_4\text{N}_6\text{O}_{10})](\text{NO}_3)_2$                                        |
| 4   | $[\text{Zn}_2(\text{H}_2\text{L}_b)(\text{NO}_3)](\text{NO}_3)$              | $[\text{Zn}_2(\text{C}_{60}\text{H}_{64}\text{Cl}_4\text{N}_6\text{O}_8)(\text{NO}_3)](\text{NO}_3)$                                |
| 5a  | $[\text{Zn}_2(\text{H}_2\text{L}_c)(\text{NO}_3)](\text{NO}_3)$              | $[\text{Zn}_2(\text{C}_{53}\text{H}_{50}\text{Cl}_4\text{N}_6\text{O}_6)(\text{NO}_3)](\text{NO}_3)$                                |
| 5b  | $[\text{Zn}_2(\text{H}_2\text{L}_d)(\text{NO}_3)](\text{NO}_3)$              | $[\text{Zn}_2(\text{C}_{53}\text{H}_{50}\text{Cl}_4\text{N}_6\text{O}_4)(\text{NO}_3)](\text{NO}_3)$                                |
| 6   | $\text{PbL}_e$                                                               | $\text{PbC}_{27}\text{H}_{25}\text{Cl}_2\text{N}_3\text{O}_3$                                                                       |
| 7   | $[\text{Pb}(\text{HL}_f)]_2(\text{NO}_3)_2$                                  | $[\text{Pb}(\text{C}_{27}\text{H}_{26}\text{Cl}_2\text{N}_3\text{O}_2)]_2(\text{NO}_3)_2$                                           |
| 8   | $[\text{ZnCl}_2(\text{H}_2\text{L}_g)]$                                      | $[\text{ZnCl}_2(\text{C}_{27}\text{H}_{27}\text{Cl}_2\text{N}_3\text{O}_2)]$                                                        |
| 9   | $[\text{ZnBr}_2(\text{H}_2\text{L}_g)]$                                      | $[\text{ZnBr}_2(\text{C}_{27}\text{H}_{27}\text{Cl}_2\text{N}_3\text{O}_2)]$                                                        |
| 10  | $[\text{Zn}_3\text{BrO}(\text{H}_2\text{L}_h)]\text{Br}$                     | $[\text{Zn}_3\text{BrO}(\text{C}_{54}\text{H}_{52}\text{Cl}_4\text{N}_6\text{O}_5)]\text{Br}$                                       |
| 11  | $[\text{Zn}_3\text{IO}(\text{H}_2\text{L}_h)]\text{I}$                       | $[\text{Zn}_3\text{IO}(\text{C}_{54}\text{H}_{52}\text{Cl}_4\text{N}_6\text{O}_5)]\text{I}$                                         |
| 12  | $[\text{Zn}_3\text{ClO}(\text{H}_2\text{L}_i)]\text{Cl}$                     | $[\text{Zn}_3\text{ClO}(\text{C}_{54}\text{H}_{52}\text{Cl}_4\text{N}_6\text{O}_7)]\text{Cl}$                                       |
| 13  | $[\text{Zn}_3\text{BrO}(\text{H}_2\text{L}_i)]\text{Br}$                     | $[\text{Zn}_3\text{BrO}(\text{C}_{54}\text{H}_{52}\text{Cl}_4\text{N}_6\text{O}_7)]\text{Br}$                                       |
| 14  | $[\text{Zn}_3\text{IO}(\text{H}_2\text{L}_i)]\text{I}$                       | $[\text{Zn}_3\text{IO}(\text{C}_{54}\text{H}_{52}\text{Cl}_4\text{N}_6\text{O}_7)]\text{I}$                                         |
| 15  | $[\text{Zn}_4\text{Cl}_4(\text{H}_2\text{L}_j)]$                             | $[\text{Zn}_4\text{Cl}_4(\text{C}_{120}\text{H}_{120}\text{Cl}_8\text{N}_{12}\text{O}_{12})]$                                       |
| 16  | $[\text{Zn}_2(\text{H}_2\text{L}_k)(\text{H}_2\text{O})_2](\text{NO}_3)_2$   | $[\text{Zn}_2(\text{C}_{60}\text{H}_{60}\text{Cl}_4\text{N}_6\text{O}_4)(\text{H}_2\text{O})_2](\text{NO}_3)_2$                     |
| 17  | $[\text{Zn}_2(\text{H}_2\text{L}_l)(\text{H}_2\text{O})_2](\text{NO}_3)_2$   | $[\text{Zn}_2(\text{C}_{60}\text{H}_{60}\text{Cl}_4\text{N}_6\text{O}_6)(\text{H}_2\text{O})_2](\text{NO}_3)_2$                     |
| 18  | $[\text{Zn}_2\text{Cl}_2(\text{H}_2\text{L}_m)]$                             | $[\text{Zn}_2\text{Cl}_2(\text{C}_{60}\text{H}_{60}\text{Cl}_4\text{N}_6\text{O}_4)]$                                               |
| 19  | $\text{Zn}_3\text{L}_n$                                                      | $\text{Zn}_3(\text{C}_{57}\text{H}_{78}\text{N}_6\text{O}_3)$                                                                       |
| 20  | $\text{Zn}_2\text{L}_o$                                                      | $\text{Zn}_2(\text{C}_{36}\text{H}_{46}\text{N}_4\text{O}_2)$                                                                       |
| 21  | $[\text{Zn}_2(\text{H}_2\text{L}_p)(\text{NO}_3)](\text{NO}_3)$              | $[\text{Zn}_2(\text{C}_{60}\text{H}_{64}\text{Cl}_4\text{N}_6\text{O}_8)(\text{NO}_3)](\text{NO}_3)$                                |
| 22  | $[\text{Zn}_2\text{Na}_2(\text{L}_q)(\text{OH})]_2[\text{N}(\text{CN})_2]_2$ | $[\text{Zn}_2\text{Na}_2(\text{C}_{124}\text{H}_{132}\text{Cl}_8\text{N}_{14}\text{O}_{16})(\text{OH})]_2[\text{N}(\text{CN})_2]_2$ |
| 23a | $[\text{Zn}_2(\text{H}_2\text{L}_r)(\text{OH})]\text{Cl}$                    | $[\text{Zn}_2(\text{C}_{56}\text{H}_{68}\text{Cl}_4\text{N}_6\text{O}_8)(\text{OH})]\text{Cl}$                                      |
| 23b | $[\text{Zn}_2(\text{H}_2\text{L}_r)(\text{OH})]\text{Br}$                    | $[\text{Zn}_2(\text{C}_{56}\text{H}_{68}\text{Cl}_4\text{N}_6\text{O}_8)(\text{OH})]\text{Br}$                                      |
| 24a | $[\text{Cd}_2(\text{H}_2\text{L}_r)\text{Cl}]_2[\text{Cd}_2\text{Cl}_6]$     | $[\text{Cd}_2(\text{C}_{56}\text{H}_{68}\text{Cl}_4\text{N}_6\text{O}_8)\text{Cl}]_2[\text{Cd}_2\text{Cl}_6]$                       |
| 24b | $[\text{Cd}_2(\text{H}_2\text{L}_r)\text{Br}]_2[\text{Cd}_2\text{Br}_6]$     | $[\text{Cd}_2(\text{C}_{56}\text{H}_{68}\text{Cl}_4\text{N}_6\text{O}_8)\text{Br}]_2[\text{Cd}_2\text{Br}_6]$                       |
| 25a | $[\text{Cu}_2(\text{H}_2\text{L}_r)\text{Cl}]\text{Cl}$                      | $[\text{Cu}_2(\text{C}_{56}\text{H}_{68}\text{Cl}_4\text{N}_6\text{O}_8)\text{Cl}]\text{Cl}$                                        |
| 25b | $[\text{Cu}_2(\text{H}_2\text{L}_r)\text{Br}]\text{Br}$                      | $[\text{Cu}_2(\text{C}_{56}\text{H}_{68}\text{Cl}_4\text{N}_6\text{O}_8)\text{Br}]\text{Br}$                                        |
| 26a | $[\text{Cu}_2(\text{HL}_s)\text{Cl}_2]_2[\text{CuCl}_4]$                     | $[\text{Cu}_2(\text{C}_{28}\text{H}_{34}\text{Cl}_2\text{N}_3\text{O}_4)\text{Cl}_2]_2[\text{CuCl}_4]$                              |
| 26b | $[\text{Cu}_2(\text{HL}_s)\text{Cl}_2]_2[\text{CdCl}_4]$                     | $[\text{Cu}_2(\text{C}_{28}\text{H}_{34}\text{Cl}_2\text{N}_3\text{O}_4)\text{Cl}_2]_2[\text{CdCl}_4]$                              |
| 27  | $[\text{Zn}_2\text{L}_t(\text{H}_2\text{O})_2](\text{ClO}_4)_2$              | $[\text{Zn}_2(\text{C}_{24}\text{H}_{26}\text{N}_4\text{O}_2)(\text{H}_2\text{O})_2](\text{ClO}_4)_2$                               |
| 28  | $[\text{Zn}_2\text{L}_t(\text{py}-4\text{-SH})_2](\text{ClO}_4)_2$           | $[\text{Zn}_2(\text{C}_{24}\text{H}_{26}\text{N}_4\text{O}_2)(\text{C}_5\text{H}_5\text{NS})_2](\text{ClO}_4)_2$                    |
| 29  | $[\text{Zn}_2\text{L}_u(\text{EtOH})(\text{H}_2\text{O})]$                   | $[\text{Zn}_2(\text{C}_{44}\text{H}_{28}\text{Cl}_4\text{N}_4\text{O}_4)(\text{EtOH})(\text{H}_2\text{O})]$                         |
| 30  | $[\text{Zn}_2\text{L}_v(\text{DMF})(\text{H}_2\text{O})]$                    | $[\text{Zn}_2(\text{C}_{44}\text{H}_{28}\text{Cl}_4\text{N}_4\text{O}_8)(\text{DMF})(\text{H}_2\text{O})]$                          |
